# Supplementary material
Source: HighWire-hosted journal article supplement (https://bmjopen.bmj.com/content/13/12/e071198)
Supplement: inline-supplementary-material-1 [file inline-supplementary-material-1.pdf]

## Supplementary Appendix

Country adoption of WHO 2019 guidance on HIV testing strategies and algorithms: a policy review across the WHO African region

Emmanuel Fajardo,<sup>1</sup> Céline Lastrucci,<sup>1</sup> Nayé Bah,<sup>2</sup> Casimir Manzenge Mingiedi,<sup>3</sup> Ndoungou Salla Ba,<sup>4</sup> Fausta Shakiwa Moshia,<sup>5</sup> Frank John Lule,<sup>6</sup> Margaret Alia Sampson Paul,<sup>6</sup> Lago Hughes,<sup>6</sup> Magdalena Barr-DiChiara,<sup>1</sup> Muhammad Shahid Jamil,<sup>1</sup> Anita Sands,<sup>7</sup> Rachel Baggeley,<sup>1</sup> Cheryl Johnson<sup>1</sup>

**Supplementary Figure 1.** Countries in the WHO African Region and grouping by subregion

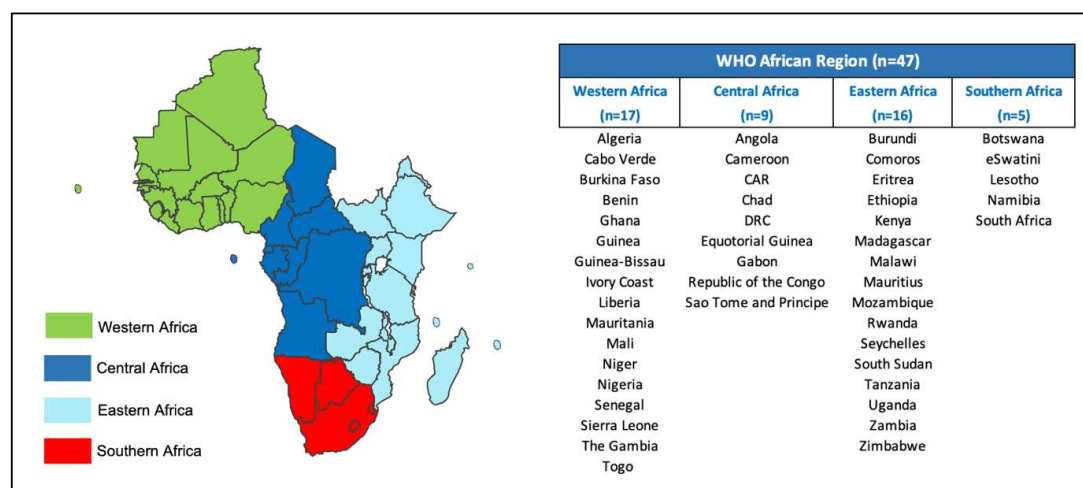

**Supplementary Table 1.** Categories for data extraction

| <b>1. Policy Information</b>                                                                                                                                                                                                                                                                                                                                                                                                                                                                                                                                                                                                                                         |                                                                                                                                                                                                                                                                                                                                                                                                                                                                                 |
|----------------------------------------------------------------------------------------------------------------------------------------------------------------------------------------------------------------------------------------------------------------------------------------------------------------------------------------------------------------------------------------------------------------------------------------------------------------------------------------------------------------------------------------------------------------------------------------------------------------------------------------------------------------------|---------------------------------------------------------------------------------------------------------------------------------------------------------------------------------------------------------------------------------------------------------------------------------------------------------------------------------------------------------------------------------------------------------------------------------------------------------------------------------|
| <ul style="list-style-type: none"> <li>▪ Country</li> <li>▪ WHO region</li> <li>▪ HIV testing policy identified?</li> </ul>                                                                                                                                                                                                                                                                                                                                                                                                                                                                                                                                          | <ul style="list-style-type: none"> <li>▪ Year of policy publication</li> <li>▪ Type of policy document</li> <li>▪ National HIV prevalence</li> </ul>                                                                                                                                                                                                                                                                                                                            |
| <b>2. HIV testing algorithm (after 18 months of age)</b>                                                                                                                                                                                                                                                                                                                                                                                                                                                                                                                                                                                                             |                                                                                                                                                                                                                                                                                                                                                                                                                                                                                 |
| <ul style="list-style-type: none"> <li>▪ HIV testing algorithm provided?</li> <li>▪ Image or text format?</li> <li>▪ Type of scenario in which algorithm is used</li> <li>▪ Number of assays used in algorithm</li> <li>▪ Serial or parallel strategy</li> <li>▪ Use of tiebreaker?</li> <li>▪ Use of Western Blot or LIA?</li> <li>▪ Mention of test order relating to sens/spec?</li> <li>▪ High or low prevalence strategy used?</li> <li>▪ Type of tests mentioned?</li> <li>▪ Brand of tests mentioned?</li> <li>▪ Are assays pre-qualified by WHO?</li> <li>▪ A1 test name</li> <li>▪ A1 type of assay</li> </ul>                                              | <ul style="list-style-type: none"> <li>▪ A1 sens-/spec</li> <li>▪ A2 test name</li> <li>▪ A2 type of assay</li> <li>▪ A2 sens-/spec</li> <li>▪ A3 test name</li> <li>▪ A3 type of assay</li> <li>▪ A3 sens-/spec</li> <li>▪ Source of assay sens/spec</li> <li>▪ Mention of in-country assay validation</li> <li>▪ Alignment with WHO policy?</li> <li>▪ Primary reason(s) algorithm fails to meet WHO recommendations</li> <li>▪ Other notes about testing strategy</li> </ul> |
| <b>3. HIV testing algorithm among pregnant women using dual HIV/Syphilis RDTs</b>                                                                                                                                                                                                                                                                                                                                                                                                                                                                                                                                                                                    |                                                                                                                                                                                                                                                                                                                                                                                                                                                                                 |
| <ul style="list-style-type: none"> <li>▪ HIV testing algorithm provided?</li> <li>▪ Image or text format?</li> <li>▪ Type of scenario in which algorithm is used</li> <li>▪ Type of scenario in which algorithm should not be used (women on ART, already diagnosed/treated for syphilis, retesting for HIV)</li> <li>▪ What is there syphilis testing strategy for women with HIV?</li> <li>▪ Is dual test used as A1 or A0?</li> <li>▪ Is the dual test algorithm aligned with the national HIV testing algorithm?</li> <li>▪ Is the dual test algorithm aligned with the national syphilis testing algorithm?</li> <li>▪ Brand of dual test mentioned?</li> </ul> | <ul style="list-style-type: none"> <li>▪ Is dual test prequalified by WHO?</li> <li>▪ Dual test name</li> <li>▪ Mention of penicillin treatment for reactive TP?</li> <li>▪ Mention of further testing for reactive TP?</li> <li>▪ Mention of in-country assay validation</li> <li>▪ Alignment with WHO policy?</li> <li>▪ Primary reason(s) algorithm fails to meet WHO recommendations</li> <li>▪ Other notes about testing strategy</li> </ul>                               |
| <b>4. Retesting prior to ART initiation</b>                                                                                                                                                                                                                                                                                                                                                                                                                                                                                                                                                                                                                          |                                                                                                                                                                                                                                                                                                                                                                                                                                                                                 |
| <ul style="list-style-type: none"> <li>▪ Retest required before starting ART?</li> <li>▪ Retest strategy same as national algorithm?</li> <li>▪ Notes about retesting strategy</li> </ul>                                                                                                                                                                                                                                                                                                                                                                                                                                                                            |                                                                                                                                                                                                                                                                                                                                                                                                                                                                                 |

**Supplementary Table 2.** List of national policies on HIV testing services in the WHO African Region collected in 2018 and 2021 by subregion

| Subregion       | Count     | Country               | Policy reviewed in 2018? | New policy or algorithm identified? | Publication year | Type of document | Language   | Algorithm provided? | National HIV prevalence |
|-----------------|-----------|-----------------------|--------------------------|-------------------------------------|------------------|------------------|------------|---------------------|-------------------------|
| Central Africa  | 1         | Angola                | Yes, 2015                | Yes                                 | 2020             | HTS              | Portuguese | Yes                 | Low                     |
|                 | 2         | Cameroon              | Yes, 2015                | Yes                                 | 2019             | ART              | French     | Yes                 | Low                     |
|                 | 3         | CAR                   | Yes, 2010                | Yes                                 | 2018             | ART              | French     | Yes                 | Low                     |
|                 | 4         | Chad                  | Yes, 2011                | Yes                                 | 2017             | HTS              | French     | Yes                 | Low                     |
|                 | 5         | DRC                   | Yes, 2017                | Yes                                 | 2020             | ART              | French     | Yes                 | Low                     |
|                 | 6         | Equatorial Guinea     | No                       | Yes                                 | 2018             | ART              | Spanish    | Yes                 | Low                     |
|                 | 7         | Gabon                 | No                       | Yes                                 | 2017             | HTS              | French     | Yes                 | Low                     |
|                 | 8         | Republic of the Congo | No                       | <b>No</b>                           | –                | –                | –          | –                   | –                       |
|                 | 9         | São Tomé e Príncipe   | No                       | Yes                                 | 2018             | Algorithm        | Portuguese | Yes                 | Low                     |
| Eastern Africa  | 10        | Burundi               | Yes, 2016                | Yes                                 | 2020             | HTS              | French     | Yes                 | Low                     |
|                 | 11        | Comoros               | Yes, 2007                | Yes                                 | 2016             | HTS              | French     | Yes                 | Low                     |
|                 | 12        | Eritrea               | No                       | Yes                                 | 2019             | HTS              | English    | Yes                 | Low                     |
|                 | 13        | Ethiopia              | Yes, 2017                | Yes                                 | 2018             | ART              | English    | Yes                 | Low                     |
|                 | 14        | Kenya                 | Yes, 2017                | Yes                                 | 2021             | HTS              | English    | Yes                 | Low                     |
|                 | 15        | Madagascar            | Yes, 2011                | Yes                                 | 2018             | HTS              | French     | Yes                 | Low                     |
|                 | 16        | Malawi*               | Yes, 2016                | Yes*                                | 2016             | HTS              | English    | Yes                 | High                    |
|                 | 17        | Mauritius             | No                       | Yes                                 | 2020             | HTS              | English    | Yes                 | Low                     |
|                 | 18        | Mozambique            | Yes, 2016                | Yes                                 | 2020             | PMTCT            | Portuguese | Yes                 | High                    |
|                 | 19        | Rwanda                | Yes, 2016                | Yes                                 | 2018             | HTS              | English    | Yes                 | Low                     |
|                 | 20        | Seychelles            | No                       | Yes                                 | 2019             | HTS              | English    | Yes                 | Low                     |
|                 | 21        | South Sudan           | Yes, 2017                | Yes                                 | 2020             | ART              | English    | Yes                 | Low                     |
|                 | 22        | Tanzania              | Yes, 2017                | Yes                                 | 2021             | HTS              | English    | Yes                 | High                    |
|                 | 23        | Uganda                | Yes, 2016                | Yes                                 | 2020             | ART              | English    | Yes                 | High                    |
|                 | 24        | Zambia                | Yes, 2018                | Yes                                 | 2020             | HTS              | English    | Yes                 | High                    |
| 25              | Zimbabwe* | Yes, 2016             | Yes*                     | 2016                                | Other            | English          | Yes        | High                |                         |
| Southern Africa | 26        | Botswana**            | Yes, 2016                | <b>No</b>                           | 2016             | ART              | English    | Yes                 | High                    |
|                 | 27        | eSwatini**            | Yes, 2018                | <b>No</b>                           | 2018             | ART              | English    | Yes                 | High                    |
|                 | 28        | Lesotho               | Yes, 2016                | Yes                                 | 2021             | PMTCT            | English    | Yes                 | High                    |

|                   |            |               |           |           |      |         |            |     |      |
|-------------------|------------|---------------|-----------|-----------|------|---------|------------|-----|------|
|                   | 29         | Namibia       | Yes, 2016 | Yes       | 2018 | HTS     | English    | Yes | High |
|                   | 30         | South Africa  | Yes, 2016 | Yes       | 2020 | ART     | English    | Yes | High |
| Western<br>Africa | 31         | Algeria**     | Yes, 2013 | <b>No</b> | 2013 | HTS     | French     | Yes | Low  |
|                   | 32         | Benin         | No        | Yes       | 2017 | HTS     | French     | Yes | Low  |
|                   | 33         | Burkina Faso  | Yes, 2008 | Yes       | 2021 | ART     | French     | Yes | Low  |
|                   | 34         | Cabo Verde    | No        | <b>No</b> | –    | –       | –          | –   | –    |
|                   | 35         | Ghana         | Yes, 2014 | Yes       | 2019 | ART     | English    | Yes | Low  |
|                   | 36         | Guinea        | No        | Yes       | 2019 | HTS     | French     | Yes | Low  |
|                   | 37         | Guinea-Bissau | No        | Yes       | 2021 | ART     | Portuguese | Yes | Low  |
|                   | 38         | Ivory Coast** | Yes, 2016 | <b>No</b> | 2016 | HTS     | French     | Yes | Low  |
|                   | 39         | Liberia       | Yes, 2015 | Yes       | 2020 | HTS     | English    | Yes | Low  |
|                   | 40         | Mauritania    | No        | Yes       | 2020 | HTS     | French     | Yes | Low  |
|                   | 41         | Mali          | No        | Yes       | 2017 | HTS     | French     | Yes | Low  |
|                   | 42         | Niger         | No        | Yes       | 2020 | HTS     | French     | Yes | Low  |
|                   | 43         | Nigeria       | Yes, 2016 | Yes       | 2020 | ART     | English    | Yes | Low  |
|                   | 44         | Senegal       | Yes, 2017 | Yes       | 2018 | HTS     | French     | Yes | Low  |
|                   | 45         | Sierra Leone  | Yes, 2017 | Yes       | 2020 | ART     | English    | Yes | Low  |
| 46                | The Gambia | Yes, 2014     | Yes       | 2019      | ART  | English | Yes        | Low |      |
| 47                | Togo       | No            | Yes       | 2019      | HTS  | French  | Yes        | Low |      |

\*These countries provided an updated HIV testing algorithm despite having an old HIV testing guideline

\*\* These countries did not provide an update HIV testing guideline but were included in the analysis

**Supplementary Table 3.** Progress on policy adoption in the WHO African Region from 2018 to 2021

| Subregion       | Count | Country               | Policy reviewed in 2018? | Adherence in 2018 | Policy reviewed in 2021 | Adherence in 2021 |
|-----------------|-------|-----------------------|--------------------------|-------------------|-------------------------|-------------------|
| Central Africa  | 1     | Angola                | Yes, 2015                | Not adopted       | 2020                    | Mostly adopted    |
|                 | 2     | Cameroon              | Yes, 2015                | Not adopted       | 2019                    | Mostly adopted    |
|                 | 3     | CAR                   | Yes, 2010                | Not adopted       | 2018                    | Not adopted       |
|                 | 4     | Chad                  | Yes, 2011                | Not adopted       | 2017                    | Mostly adopted    |
|                 | 5     | DRC                   | Yes, 2017                | Adopted           | 2020                    | Adopted           |
|                 | 6     | Equatorial Guinea     | No                       | –                 | 2018                    | Not adopted       |
|                 | 7     | Gabon                 | No                       | –                 | 2017                    | Mostly adopted    |
|                 | 8     | Republic of the Congo | No                       | –                 | –                       | –                 |
|                 | 9     | São Tomé e Príncipe   | No                       | –                 | 2018                    | Not adopted       |
| Eastern Africa  | 10    | Burundi               | Yes, 2016                | Not adopted       | 2020                    | Mostly adopted    |
|                 | 11    | Comoros               | Yes, 2007                | No information    | 2016                    | Not adopted       |
|                 | 12    | Eritrea               | No                       | –                 | 2019                    | Not adopted       |
|                 | 13    | Ethiopia              | Yes, 2017                | No information    | 2018                    | Mostly adopted    |
|                 | 14    | Kenya                 | Yes, 2017                | Mostly adopted    | 2021                    | Adopted           |
|                 | 15    | Madagascar            | Yes, 2011                | No information    | 2018                    | Mostly adopted    |
|                 | 16    | Malawi                | Yes, 2016                | Not adopted       | 2016                    | Mostly adopted    |
|                 | 17    | Mauritius             | No                       | –                 | 2020                    | Not adopted       |
|                 | 18    | Mozambique            | Yes, 2016                | Not adopted       | 2020                    | Mostly adopted    |
|                 | 19    | Rwanda                | Yes, 2016                | Not adopted       | 2018                    | Mostly adopted    |
|                 | 20    | Seychelles            | No                       | –                 | 2019                    | Not adopted       |
|                 | 21    | South Sudan           | Yes, 2017                | Not adopted       | 2020                    | Adopted           |
|                 | 22    | Tanzania              | Yes, 2017                | Not adopted       | 2021                    | Mostly adopted    |
|                 | 23    | Uganda                | Yes, 2016                | Mostly adopted    | 2020                    | Mostly adopted    |
|                 | 24    | Zambia                | Yes, 2018                | Not adopted       | 2020                    | Not adopted       |
|                 | 25    | Zimbabwe              | Yes, 2016                | Adopted           | 2016                    | Adopted           |
| Southern Africa | 26    | Botswana              | Yes, 2016                | Mostly adopted    | 2016                    | Not adopted       |
|                 | 27    | eSwatini              | Yes, 2018                | Not adopted       | 2018                    | Not adopted       |
|                 | 28    | Lesotho               | Yes, 2016                | Adopted           | 2021                    | Mostly adopted    |
|                 | 29    | Namibia               | Yes, 2016                | No information    | 2018                    | Not adopted       |
|                 | 30    | South Africa          | Yes, 2016                | Mostly adopted    | 2020                    | Not adopted       |
| Western Africa  | 31    | Algeria               | Yes, 2013                | Adopted           | 2013                    | Not adopted       |
|                 | 32    | Benin                 | No                       | –                 | 2017                    | Not adopted       |
|                 | 33    | Burkina Faso          | Yes, 2008                | Not adopted       | 2021                    | Mostly adopted    |
|                 | 34    | Cabo Verde            | No                       | –                 | –                       | –                 |
|                 | 35    | Ghana                 | Yes, 2014                | Not adopted       | 2019                    | Mostly adopted    |
|                 | 36    | Guinea                | No                       | –                 | 2019                    | Mostly adopted    |
|                 | 37    | Guinea-Bissau         | No                       | –                 | 2021                    | Not adopted       |
|                 | 38    | Ivory Coast           | Yes, 2016                | Not adopted       | 2016                    | Not adopted       |
|                 | 39    | Liberia               | Yes, 2015                | Not adopted       | 2020                    | Mostly adopted    |
|                 | 40    | Mauritania            | No                       | –                 | 2020                    | Not adopted       |
|                 | 41    | Mali                  | No                       | –                 | 2017                    | Not adopted       |
|                 | 42    | Niger                 | No                       | –                 | 2020                    | Not adopted       |
|                 | 43    | Nigeria               | Yes, 2016                | Not adopted       | 2020                    | Mostly adopted    |
|                 | 44    | Senegal               | Yes, 2017                | Mostly adopted    | 2018                    | Not adopted       |
|                 | 45    | Sierra Leone          | Yes, 2017                | Not adopted       | 2020                    | Not adopted       |
|                 | 46    | The Gambia            | Yes, 2014                | Not adopted       | 2019                    | Not adopted       |
|                 | 47    | Togo                  | No                       | –                 | 2019                    | Not adherent      |

A total of 32 countries had policies reviewed in 2018 and 2021. Those highlighted in red are policies reviewed in 2018 that were updated (n=28). Number of policies deemed adopted in 2018 (n=7) and number deemed adopted in 2021 (n=20)

**Supplementary Figure 2.** Comparing policy adoption across countries, 2018 vs 2021

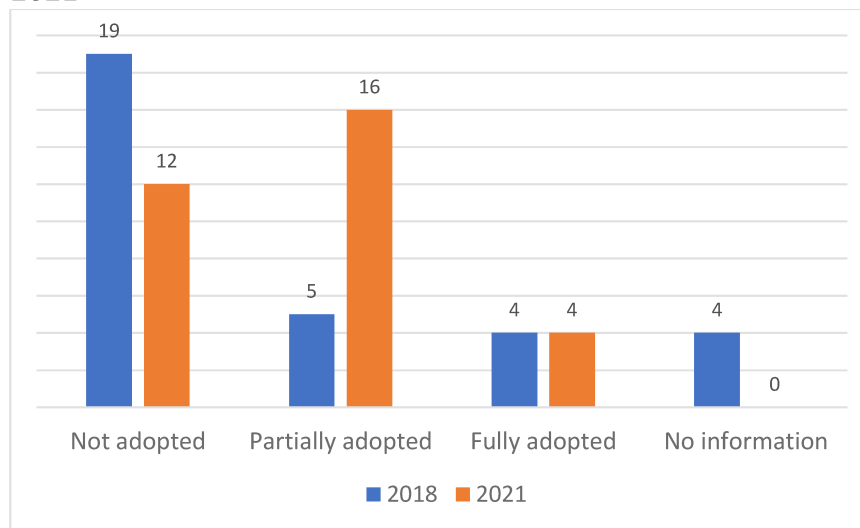

**Supplementary Table 4.** Policy adoption of 2019 WHO-recommended HIV testing strategies in the WHO African region, 2014-2021

| AFRO subregions (countries) | Policies reviewed |             |              | Serial testing strategy |             |             | Discontinuation of tiebreaker* testing strategy |             |              | Retesting prior to ART initiation |             | Universal 3-test strategy | Use of dual HIV/syphilis test** | No use of Western Blot |
|-----------------------------|-------------------|-------------|--------------|-------------------------|-------------|-------------|-------------------------------------------------|-------------|--------------|-----------------------------------|-------------|---------------------------|---------------------------------|------------------------|
|                             | Year              | 2014        | 2018         | 2021                    | 2014        | 2018        | 2021                                            | 2014        | 2018         | 2021                              | 2018        | 2021                      | 2021                            | 2021                   |
| All (n=47)                  | 25<br>(53%)       | 32<br>(68%) | 45<br>(96%)  | 21<br>(84%)             | 26<br>(81%) | 29<br>(64%) | 15<br>(60%)                                     | 26<br>(81%) | 37<br>(82%)  | 16<br>(50%)                       | 23<br>(51%) | 21<br>(47%)               | 21<br>(47%)                     | 35<br>(78%)            |
| Western (n=17)              | 6<br>(35%)        | 9<br>(53%)  | 16<br>(94%)  | 5<br>(83%)              | 7<br>(78%)  | 9<br>(56%)  | 4<br>(67%)                                      | 5<br>(56%)  | 9<br>(56%)   | 1<br>(11%)                        | 5<br>(31%)  | 8<br>(50%)                | 7<br>(44%)                      | 10<br>(63%)            |
| Central (n=9)               | 4<br>(44%)        | 5<br>(56%)  | 8<br>(89%)   | 4<br>(100%)             | 5<br>(100%) | 7<br>(88%)  | 3<br>(75%)                                      | 4<br>(80%)  | 7<br>(88%)   | 1<br>(20%)                        | 5<br>(63%)  | 3<br>(38%)                | 2<br>(25%)                      | 6<br>(75%)             |
| Eastern (n=16)              | 11<br>(69%)       | 13<br>(81%) | 16<br>(100%) | 10<br>(91%)             | 10<br>(77%) | 12<br>(75%) | 5<br>(45%)                                      | 12<br>(92%) | 16<br>(100%) | 9<br>(69%)                        | 9<br>(56%)  | 9<br>(56%)                | 9<br>(56%)                      | 14<br>(88%)            |
| Southern (n=5)              | 4<br>(80%)        | 5<br>(100%) | 5<br>(100%)  | 2<br>(40%)              | 4<br>(80%)  | 1<br>(20%)  | 3<br>(75%)                                      | 5<br>(100%) | 5<br>(100%)  | 5<br>(100%)                       | 4<br>(80%)  | 1<br>(20%)                | 3<br>(60%)                      | 5<br>(100%)            |

\*Use of a third assay to rule-in HIV infection

\*\*Dual HIV/syphilis RDT as first test in ANC

**Supplementary Table 5.** Short name of products used as part of the 2-assay or 3-assay HIV testing algorithm in 28 HIV national testing policy documents reviewed in 2021

| Strategy | Count | Country             | Assay 1                                                                                                                                                                                                                                           | Assay 2                                                                                 | Assay 3                                                                                                    |
|----------|-------|---------------------|---------------------------------------------------------------------------------------------------------------------------------------------------------------------------------------------------------------------------------------------------|-----------------------------------------------------------------------------------------|------------------------------------------------------------------------------------------------------------|
| 2-assay  | 1     | Angola              | Determine                                                                                                                                                                                                                                         | Uni-Gold                                                                                | –                                                                                                          |
|          | 2     | Cameroon            | Determine or Uni-Gold                                                                                                                                                                                                                             | OraQuick or Shanghai                                                                    | –                                                                                                          |
|          | 3     | CAR                 | Determine                                                                                                                                                                                                                                         | Uni-Gold                                                                                | –                                                                                                          |
|          | 4     | Cote D'Ivoire       | Determine                                                                                                                                                                                                                                         | SD Bioline or GenieFast                                                                 | StatPak or EIA<br>(as tiebreaker)                                                                          |
|          | 5     | Equatorial Guinea   | Determine                                                                                                                                                                                                                                         | Hexagon                                                                                 | Uni-Gold<br>(for discordants)                                                                              |
|          | 6     | eSwatini            | Determine                                                                                                                                                                                                                                         | Uni-Gold                                                                                | –                                                                                                          |
|          | 7     | Gambia              | Determine                                                                                                                                                                                                                                         | SD Bioline or First Response                                                            | –                                                                                                          |
|          | 8     | Guinea Bissau       | Determine                                                                                                                                                                                                                                         | First Response                                                                          | PCR<br>(as tiebreaker)                                                                                     |
|          | 9     | Mali                | Alere Combo                                                                                                                                                                                                                                       | SD Bioline                                                                              | First Response<br>(as tiebreaker)                                                                          |
|          | 10    | Mozambique          | Determine                                                                                                                                                                                                                                         | Uni-Gold                                                                                | –                                                                                                          |
|          | 11    | Rwanda              | Alere Combo                                                                                                                                                                                                                                       | StatPak                                                                                 | –                                                                                                          |
|          | 12    | São Tomé e Príncipe | Determine                                                                                                                                                                                                                                         | SD Bioline                                                                              | PCR<br>(as tiebreaker)                                                                                     |
|          | 13    | Sierra Leone        | Determine                                                                                                                                                                                                                                         | SD Bioline                                                                              | Uni-Gold<br>(as tiebreaker)                                                                                |
|          | 14    | Uganda              | Determine                                                                                                                                                                                                                                         | StatPak                                                                                 | SD Bioline<br>(for discordants)                                                                            |
|          | 15    | Nigeria             | Determine<br>Uni-Gold<br>Stat-Pak<br>Double Check Gold<br>Sure Check<br>HIV Quick Check                                                                                                                                                           | Determine<br>Uni-Gold<br>Stat-Pak<br>Double Check Gold<br>Sure Check<br>HIV Quick Check | Determine<br>Uni-Gold<br>Stat-Pak<br>Double Check Gold<br>Sure Check<br>HIV Quick Check<br>(as tiebreaker) |
|          | 16    | Togo                | Murex HIV Ag/Ab<br>Apdia HIV Ag/Ab<br>Determine<br>Alere Combo<br>Vikia HIV 1/2<br>Wanta Rapid Test<br>ABON HIV 1/2/0<br>Standard Q<br>Hexagon<br>Genie Fast<br>SD Bioline<br>First Response<br>SD Bioline HIV/Syphilis<br>OraQuick HIV Self-Test | ABON HIV 1/2/0<br>Standard Q<br>SD Bioline<br>First Response<br>HIV Tri-Dot             | INNOLIA or Genius<br>(as tiebreaker)                                                                       |
| 3-assay  | 17    | Burundi             | Alere Combo or<br>Determine                                                                                                                                                                                                                       | SD Bioline or Uni-Gold                                                                  | Wondfo One Step                                                                                            |
|          | 18    | Gabon               | Alere Combo                                                                                                                                                                                                                                       | Determine                                                                               | SD Bioline                                                                                                 |
|          | 19    | Ghana               | First Response                                                                                                                                                                                                                                    | OraQuick                                                                                | SD Bioline                                                                                                 |
|          | 20    | Guinea              | Determine                                                                                                                                                                                                                                         | SD Bioline                                                                              | Multisure                                                                                                  |
|          | 21    | Kenya               | INSTI                                                                                                                                                                                                                                             | Uni-Gold                                                                                | SD Bioline                                                                                                 |
|          | 22    | Liberia             | Determine                                                                                                                                                                                                                                         | SD Bioline                                                                              | Uni-Gold                                                                                                   |
|          | 23    | Madagascar          | Determine                                                                                                                                                                                                                                         | Uni-Gold                                                                                | SD Bioline                                                                                                 |
|          | 24    | Mauritius           | GenScreen Ultra Ag/Ab                                                                                                                                                                                                                             | Alere Combo                                                                             | Western Blot                                                                                               |
|          | 25    | Malawi              | INSTI                                                                                                                                                                                                                                             | Uni-Gold                                                                                | SD Bioline                                                                                                 |



|  |    |              |                                                                                                                                                                           |                                                                        |                                          |
|--|----|--------------|---------------------------------------------------------------------------------------------------------------------------------------------------------------------------|------------------------------------------------------------------------|------------------------------------------|
|  | 26 | Niger        | Alere Combo                                                                                                                                                               | Wondfo One Step                                                        | SD Bioline                               |
|  | 27 | Senegal      | Determine                                                                                                                                                                 | SD Bioline                                                             | Multisure                                |
|  | 28 | Zimbabwe     | Determine                                                                                                                                                                 | ChemBio                                                                | INSTI                                    |
|  | 29 | Burkina Faso | 3rd generation:<br>Determine<br>Double check Gold Ultra<br>Onsite HIV1+2 Plus<br>Combo<br>VIKIA HIV 1/2<br>4th generation:<br>Alere Ag/Ab Combo<br>OnSite HIV Ab/Ag (CTK) | HIV TriDot<br>ImmunoFlow<br>OnSite HIV 1/2 Ab Plus (CTK)<br>SD Bioline | Any of those not<br>selected as A1 or A2 |
